# Psychiatric Services

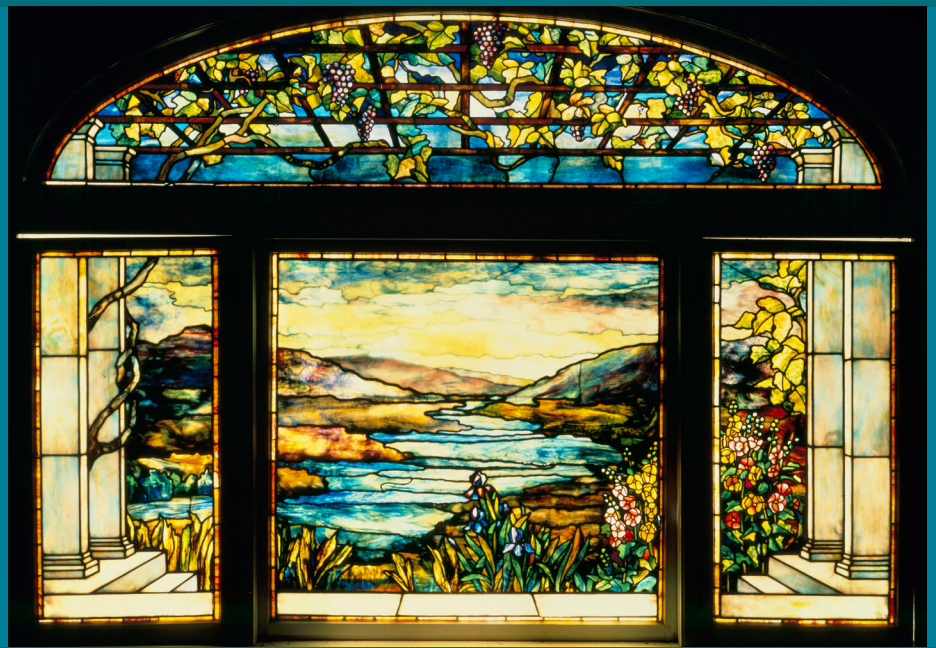

Perceptions of coercion among patients on community treatment orders: a review

Focus on mental health services for jail and prison inmates: four reports

An RCT of self-management support services for patients with chronic depression

“Communities of practice” to promote recovery and system transformation
