Just Published!

American Psychiatric Association Publishing

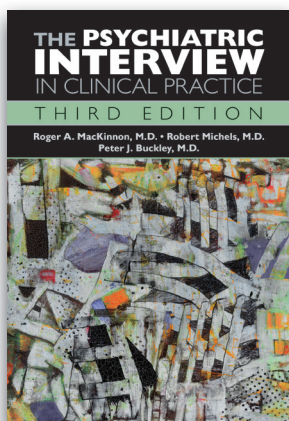

## The Psychiatric Interview in Clinical Practice, Third Edition

Roger A. MacKinnon, M.D., Robert Michels, M.D., and Peter J. Buckley, M.D.

It has been nearly a half-century since the inaugural edition of *The Psychiatric Interview in Clinical Practice*, and the book's status as a classic was again validated with the second edition a decade ago. This new, third edition maintains the book's reputation with thoroughly updated content that reflects changes brought about by the publication of DSM-5. The book presents the psychiatric interview in the context of the enormous and ongoing progress that has been made in biological and descriptive psychiatry. In addition, the book emphasizes the shift in the social

relationship between patient and clinician, recognizing that the therapeutic alliance has become the foundation of all medical treatment efforts and that patients are now better informed and seek active involvement in treatment decisions. The text reflects this growing equality and supports the clinician's efforts to nurture the relationship for optimum therapeutic outcomes. The chapter on the traumatized patient has been completely updated for this edition, and a chapter on the patient with dissociative identity disorder has been added.

*The Psychiatric Interview in Clinical Practice* will benefit mental health clinicians, both seasoned and in training, ensuring that their skills are current and their knowledge cutting-edge.

2016 • 704 pages • ISBN 978-1-61537-034-4 • Hardcover • \$79.00 • Item #37034

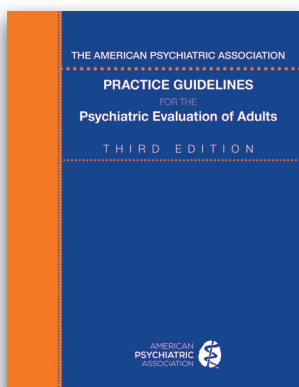

## The American Psychiatric Association Practice Guidelines for the Psychiatric Evaluation of Adults, Third Edition

American Psychiatric Association

This new edition of the practice guidelines on psychiatric evaluation for adults is the first set of the APA's guidelines developed under the new guideline development process. These guidelines address the following nine topics, in the context of an initial psychiatric evaluation: review of psychiatric symptoms, trauma history, and treatment history; substance use assessment; assessment of suicide risk; assessment for risk of aggressive behaviors;

assessment of cultural factors; assessment of medical health; quantitative assessment; involvement of the patient in treatment decision making; and documentation of the psychiatric evaluation. Each guideline recommends or suggests topics to include during an initial psychiatric evaluation. Findings from an expert opinion survey have also been taken into consideration in making recommendations or suggestions. In addition to reviewing the available evidence on psychiatry evaluation, each guideline also provides guidance to clinicians on implementing these recommendations to enhance patient care.

2016 • 170 pages • ISBN 978-0-89042-465-0 • Paperback • \$65.00 • Item #2465

2016 • 170 pages • ISBN 978-0-89042-675-3 • eBook • \$52.00 • Item #2675

Order Now

[www.appi.org](http://www.appi.org)

AMERICAN  
PSYCHIATRIC  
ASSOCIATION  
PUBLISHING

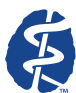

[www.appi.org](http://www.appi.org)  
Email: [appi@psych.org](mailto:appi@psych.org)  
Toll Free: 1-800-368-5777

20% Discount for American Psychiatric Association Members  
25% Discount for APA Resident-Fellow Members

Please use Priority Code AH1553 when ordering. Find us on [f](#) and [t](#).
