# Understanding Mental Disorders

## Your Guide to DSM-5®

American Psychiatric Association

**A consumer guide for anyone who has been touched by mental illness!**

***Understanding Mental Disorders: Your Guide to DSM-5®*** is a vital resource for anyone who has been touched by mental illness.

Most of us know someone who suffers from a mental illness. This book helps those who may be struggling with mental health problems, as well as those who want to help others achieve mental health and well-being.

Based on the latest, fifth edition of the *Diagnostic and Statistical Manual of Mental Disorders*—known as DSM-5®—***Understanding Mental Disorders*** provides valuable insight on what to expect from an illness and its treatment—and will help readers recognize symptoms, know when to seek help, and get the right care. Featured disorders include depression, schizophrenia, ADHD, autism spectrum disorder, posttraumatic stress disorder, and bipolar disorder, among others.

The common language for diagnosing mental illness used in DSM-5® for mental health professionals has been adapted into clear, concise descriptions of disorders for nonexperts. In addition to specific symptoms for each disorder, readers will find:

- Risk factors and warning signs
- Related disorders
- Ways to cope
- Tips to promote mental health
- Personal stories
- Key points about the disorders and treatment options
- A special chapter dedicated to treatment essentials and ways to get help
- Helpful resources that include a glossary, list of medications and support groups

For more resources and information, go to [www.psychiatry.org/UnderstandingMentalDisorders](http://www.psychiatry.org/UnderstandingMentalDisorders)

**Just  
Published!**

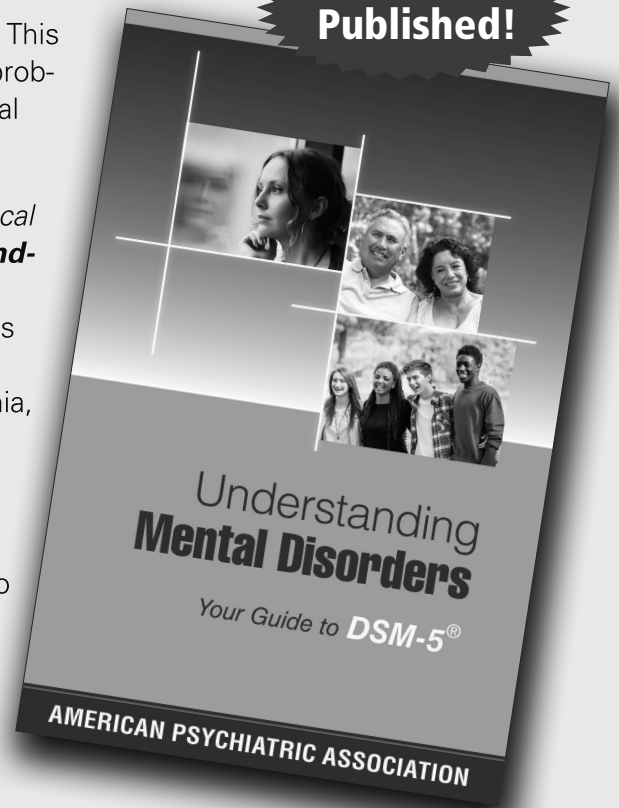

*With Foreword by  
Patrick J. Kennedy*

2015 • 370 pages • ISBN 978-1-58562-491-1 • Paperback • \$24.95 • Item #62491

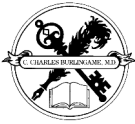

## Call for Nominations

The Institute of Living/Hartford Hospital is pleased to announce that nominations are now being accepted for the 2016 C. Charles Burlingame Award. This award, honoring an outstanding leader in psychiatric education, research or administration, is made in the memory of Dr. Burlingame, psychiatrist-in-chief from 1931 to 1950.

We invite you to nominate a person who has significantly advanced the field of psychiatry. The nomination must include a current curriculum vitae and two letters of support describing the candidate's achievements.

The Burlingame Award which will be presented at The Institute in the fall of 2016 includes a commemorative certificate and a \$2500 honorarium.

The Institute of Living is a comprehensive behavioral health system for the evaluation and treatment of psychiatric and addiction disorders. We offer a full continuum of services to patients and remain committed to the highest standards of clinical care, research and education.

### Past Recipients

|                                      |                                       |
|--------------------------------------|---------------------------------------|
| 1988 Robert Kellner, M.D., Ph.D.     | 2002 Charles B. Nemeroff, M.D., Ph.D. |
| 1989 William T. Carpenter, Jr., M.D. | 2003 Dilip V. Jeste, M.D.             |
| 1990 Dennis P. Cantwell, M.D.        | 2004 David H. Barlow, Ph.D.           |
| 1991 George E. Vaillant, M.D.        | 2005 Herbert D. Kleber, M.D.          |
| 1992 A. John Rush, M.D.              | 2006 Daniel N. Stern, M.D.            |
| 1993 John C. Nemiah, M.D.            | 2007 Jerrold F. Rosenbaum, M.D.       |
| 1994 Maurice J. Martin, M.D.         | 2008 K. Ranga Rama Krishnan, M.D.     |
| 1995 Otto F. Kernberg, M.D.          | 2009 David J. Kupfer, M.D.            |
| 1996 Charles P. O'Brien, M.D., Ph.D. | 2010 Professor Sir Michael Rutter     |
| 1997 Glen Owen Gabbard, M.D.         | 2011 Jeffrey A. Lieberman, M.D.       |
| 1998 Lissy F. Jarvik, M.D., Ph.D.    | 2012 Judith L. Rapoport, M.D.         |
| 1999 Nancy C. Andreasen, M.D., Ph.D. | 2013 Nora D. Volkow, M.D.             |
| 2000 Lewis L. Judd, M.D.             | 2014 Daniel R. Weinberger, M.D.       |
| 2001 Paul S. Appelbaum, M.D.         | 2015 David A. Brent, M.D.             |

**Institute  
of Living**

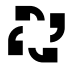

A Division of Hartford Hospital

Nominations should be sent no later than February 26, 2016 to:  
Harold I. Schwartz, M.D.  
HHC Regional VP, Behavioral Health  
Psychiatrist-in-Chief  
The Institute of Living/Hartford Hospital  
200 Retreat Avenue  
Hartford, CT 06106  
or e-mailed to Kathleen Day at  
Kathleen.Day@hhchealth.org

**Psychiatric Services** (ISSN |1075-2730; online version, 1557-9700) is published monthly by the American Psychiatric Association, editorial and executive office, 1000 Wilson Blvd., Suite 1825, Arlington, VA 22209-3901. Copyright © 2015 by the American Psychiatric Association. Printed in U.S.A. Periodicals postage paid at Arlington, VA, and at additional mailing offices. **POSTMASTER: Send address changes to *Psychiatric Services*, 1000 Wilson Blvd., Suite 1825, Arlington, VA 22209-3901.**

There's So Much More to **PSYCHIATRIC SERVICES**  
Than Meets the Page!

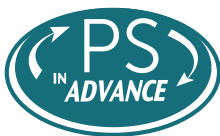

### Psychiatric Services in Advance

#### Latest research reports!

#### **Use of Antipsychotics for Nonpsychotic Children: Risks and Implications**

U.S. children are increasingly prescribed antipsychotics. The authors describe potentially serious short- and long-term side effects and outline steps to prevent unnecessary use.

#### **Rehospitalization of Suicidal Adolescents and Negative Outcomes**

Rehospitalization predicted a more severe course of suicidal ideation, including risk of future suicide, for most study participants, which examined three trajectories of suicidal ideation—subclinical, elevated but fast declining, and chronic.

#### Revisit the field's rich history!

#### **50 Years Ago in *Psychiatric Services***

- Community Clinic Treatment for Back-Ward Patients
- Separate Workshops Avoid the Family Pecking Order
- Is Symptomatic Relief Enough in Acute Psychosis?

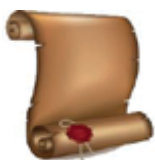

AMERICAN  
**PSYCHIATRIC  
ASSOCIATION**  
PUBLISHING

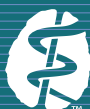

[ps.psychiatryonline.org](http://ps.psychiatryonline.org)

[www.appi.org](http://www.appi.org) • 1-800-368-5777 • Fax: 703-907-1091 • Email: [appi@psych.org](mailto:appi@psych.org)

Priority Code AH1520

# DSM-5® Classification

American Psychiatric Association

This handy **DSM-5® Classification** provides a ready reference to the DSM-5® classification of disorders, as well as the DSM-5® listings of ICD-9-CM and ICD-10-CM codes for all DSM-5® diagnoses. To be used in tandem with **DSM-5®** or the *Desk Reference to the Diagnostic Criteria From DSM-5®*.

2016 • 183 pages • ISBN 978-0-89042-566-4 • Spiralbound  
\$29.95 • Item #2566

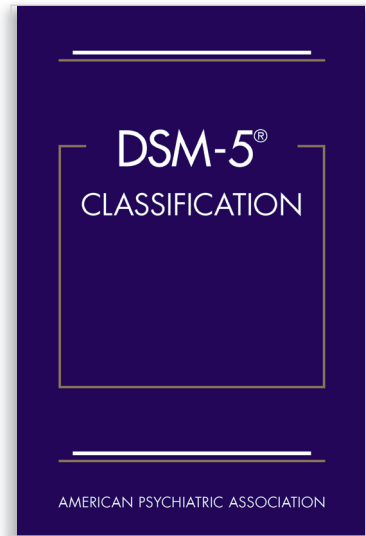

## DSM-5 Classification

Before each disorder name, ICD-9-CM codes are provided, followed by ICD-10-CM codes in parentheses. Blank lines indicate that either the ICD-9-CM or the ICD-10-CM code is not applicable. For some disorders, the code can be indicated only according to the subtype or specifier.

ICD-9-CM codes are to be used for coding purposes in the United States through September 30, 2015. ICD-10-CM codes are to be used starting October 1, 2015. For DSM-5 coding and other updates, see the DSM-5® Update on [www.PsychiatryOnline.org](http://www.PsychiatryOnline.org).

**Note for all mental disorders due to another medical condition:** Indicate the name of the other medical condition in the name of the mental disorder due to [the medical condition]. The code and name for the other medical condition should be listed first immediately before the mental disorder due to the medical condition.

### Neurodevelopmental Disorders

#### Intellectual Disabilities

|             |                                     |
|-------------|-------------------------------------|
| — (—)       | Intellectual Disability (Disorder)  |
|             | <i>Specify current severity:</i>    |
| 317 (F70)   | Mild                                |
| 318.0 (F71) | Moderate                            |
| 318.1 (F72) | Severe                              |
| 318.2 (F73) | Profound                            |
| 315.8 (F88) | Global Developmental Delay          |
| 319 (F79)   | Unspecified Intellectual Disability |

1

## Alphabetical Listing of DSM-5 Diagnoses and Codes (ICD-9-CM and ICD-10-CM)

ICD-9-CM codes are to be used for coding purposes in the United States through September 30, 2015. ICD-10-CM codes are to be used starting October 1, 2015.

For DSM-5 coding and other updates, see the DSM-5® Update on [www.PsychiatryOnline.org](http://www.PsychiatryOnline.org).

| ICD-9-CM | ICD-10-CM | Disorder, condition, or problem |
|----------|-----------|---------------------------------|
| V62.3    | Z55.9     | Academic or educational problem |
| V62.4    | Z60.3     | Acculturation difficulty        |
| 308.3    | F43.0     | Acute stress disorder           |
|          |           | Adjustment disorders            |
|          |           | With anxiety                    |
| 309.24   | F43.22    | With depressed mood             |
| 309.0    | F43.21    |                                 |

## Numerical Listing of DSM-5 Diagnoses and Codes (ICD-9-CM)

ICD-9-CM codes are to be used for coding purposes in the United States through September 30, 2015. ICD-10-CM codes are to be used starting October 1, 2015.

For DSM-5 coding and other updates, see the DSM-5® Update on [www.PsychiatryOnline.org](http://www.PsychiatryOnline.org).

| ICD-9-CM | Disorder, condition, or problem                                                                |
|----------|------------------------------------------------------------------------------------------------|
| 278.00   | Overweight or obesity                                                                          |
| 290.40   | Major neurocognitive disorder possibly due to vascular disease, With behavioral disturbance    |
| 290.40   | Major neurocognitive disorder possibly due to vascular disease, Without behavioral disturbance |
| 290.40   | Major neurocognitive disorder probably due to vascular disease, With behavioral disturbance    |
| 290.40   | Major neurocognitive disorder probably due to vascular disease, Without behavioral disturbance |

## Numerical Listing of DSM-5 Diagnoses and Codes (ICD-10-CM)

ICD-10-CM codes are to be used for coding purposes in the United States starting October 1, 2015.

For DSM-5 coding and other updates, see the DSM-5® Update on [www.PsychiatryOnline.org](http://www.PsychiatryOnline.org).

| ICD-10-CM | Disorder, condition, or problem                                                                |
|-----------|------------------------------------------------------------------------------------------------|
| E66.9     | Overweight or obesity                                                                          |
| F01.50    | Major neurocognitive disorder possibly due to vascular disease, Without behavioral disturbance |
| F01.50    | Major neurocognitive disorder probably due to vascular disease, Without behavioral disturbance |
| F01.51    | Major neurocognitive disorder possibly due to vascular disease, With behavioral disturbance    |
| F01.51    | Major neurocognitive disorder probably due to vascular disease, Without behavioral disturbance |

# DSM-5 SELECTIONS

## DSM-5® Selections

American Psychiatric Association

These selections provide a comprehensive overview of the process of diagnosing disorders while serving as a reference guide to assist in the diagnosis of individual patients. The disorder-specific resource is an invaluable addition to the DSM-5® collection and an important contribution to the mental health profession.

This book contains the critical disorder-specific content from these four titles:

- Diagnostic and Statistical Manual of Mental Disorders, Fifth Edition (DSM-5®)
- DSM-5® Clinical Cases
- DSM-5® Self-Exam Questions
- DSM-5® Guidebook

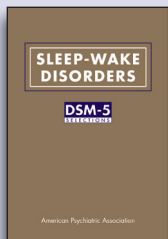

*Just Published!*

### Sleep-Wake Disorders

DSM-5® Selections

2015 • 160 pages  
ISBN 978-1-61537-009-2  
Paperback • \$39.00  
Item #37009

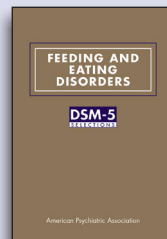

*Just Published!*

### Feeding and Eating Disorders

DSM-5® Selections

2016 • 86 pages  
ISBN 978-1-61537-012-2  
Paperback • \$39.00  
Item #37012

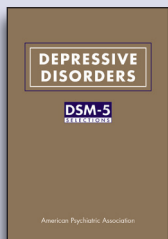

*Just Published!*

### Depressive Disorders

DSM-5® Selections

2015 • 136 pages  
ISBN 978-1-61537-010-8  
Paperback • \$39.00  
Item #37010

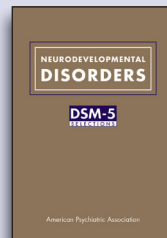

*Just Published!*

### Neurodevelopmental Disorders

DSM-5® Selections

2016 • 196 pages  
ISBN 978-1-61537-013-9  
Paperback • \$39.00  
Item #37013

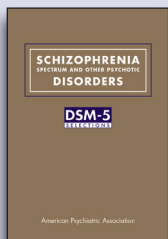

*Just Published!*

### Schizophrenia Spectrum and Other Psychotic Disorders

DSM-5® Selections

2015 • 133 pages  
ISBN 978-1-61537-011-5  
Paperback • \$39.00  
Item #37011

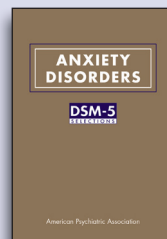

*Just Published!*

### Anxiety Disorders

DSM-5® Selections

2016 • 128 pages  
ISBN 978-1-61537-014-6  
Paperback • \$39.00  
Item #37014

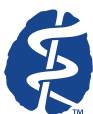

Source: https://ps.psychiatryonline.org/doi/suppl/10.1176/ps.2016.67.issue-1/suppl_file/back.pdf
